# Supplementary material for: Zn doped iron oxide nanoparticles with high magnetization and photothermal efficiency for cancer treatment
Source: J Mater Chem B. 2022 Oct 12;11(4):787–801. doi: 10.1039/d2tb01338j (PMC9890495; doi:10.1039/d2tb01338j)
Supplement: TB-011-D2TB01338J-s001 [file TB-011-D2TB01338J-s001.pdf]

## Supporting Information

### **Zn doping of ferrite nanoparticles increases magnetization and photothermal efficiency for cancer treatment**

*Georgios Kasparis<sup>a,b</sup>, Anouchka Plan Sangnier<sup>c,d</sup>, Lilin Wang<sup>a,b</sup>, Christoforos Efstathiou<sup>b</sup>, Alec P. LaGrow<sup>a,b</sup>, Andreas Sergides<sup>a,b</sup>, Claire Wilhelm<sup>c,\*</sup> and Nguyen Thi Kim Thanh<sup>a,b,\*</sup>*

- a. Biophysics Group, Department of Physics and Astronomy, University College London, Gower street, London WC1E 6BT, UK
- b. UCL Healthcare Biomagnetic and Nanomaterials Laboratories, 21 Albemarle street, London W1S 4BS, UK
- c. Laboratoire PhysicoChimie Curie, Institut Curie, PSL Research University - Sorbonne Université – CNRS, 75005 Paris, France.
- d. Inserm, U1148, Laboratory for Vascular Translational Science, Universite Paris 13, Sorbonne Paris Cité, Bobigny F-93017, France..

\*Email: [ntk.thanh@ucl.ac.uk](mailto:ntk.thanh@ucl.ac.uk) , [claire.wilhelm@curie.fr](mailto:claire.wilhelm@curie.fr)

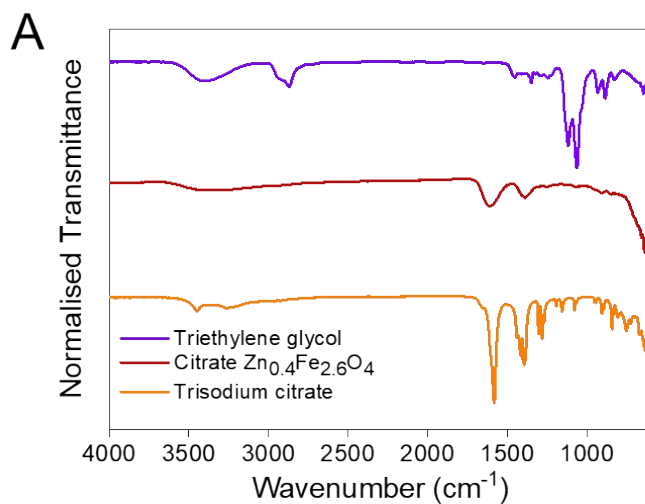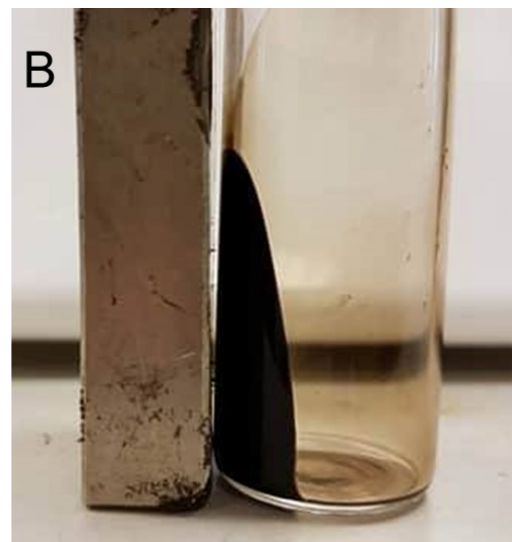

**Figure S1. A) ATR-FTIR of TREG, trisodium citrate coated  $\text{Zn}_{0.4}\text{Fe}_{2.6}\text{O}_4$  NPs and trisodium citrate. B) Digital image of stable trisodium citrate coated  $\text{Zn}_{0.4}\text{Fe}_{2.6}\text{O}_4$  ferrofluid under the influence of a bar magnet.**

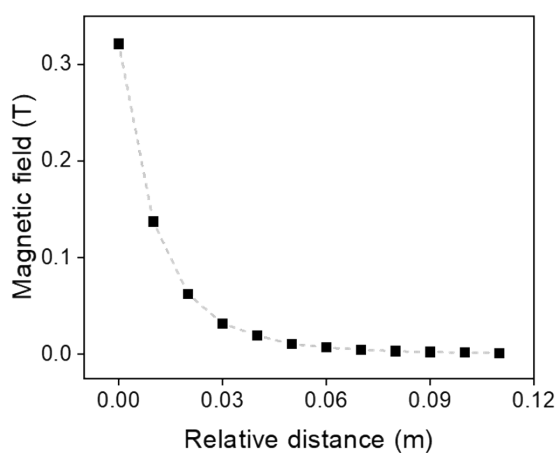

| Relative Distance (m) | Magnetic Field (T) | Field Gradient (dB/dx) |
|-----------------------|--------------------|------------------------|
| 0                     | 0.321              |                        |
| 0.01                  | 0.1373             | -18.37                 |
| 0.02                  | 0.0626             | -7.47                  |
| 0.03                  | 0.0321             | -3.05                  |
| 0.04                  | 0.01945            | -1.265                 |
| 0.05                  | 0.01089            | -0.856                 |
| 0.06                  | 0.00717            | -0.372                 |
| 0.07                  | 0.00507            | -0.21                  |
| 0.08                  | 0.00337            | -0.17                  |
| 0.09                  | 0.002495           | -0.0875                |
| 0.1                   | 0.001871           | -0.0624                |
| 0.11                  | 0.001535           | -0.0336                |

**Figure S2. Magnetic field measurements over distance using a gaussmeter for the bar magnet used in single cell magnetophoresis.**

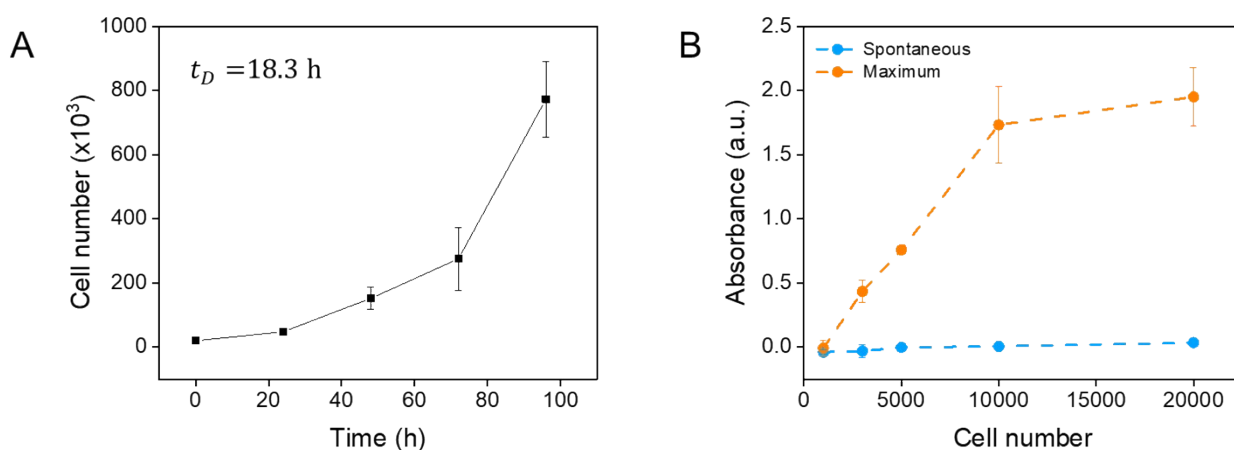

**Figure S3. A) U87MG cell growth curve. B) Spontaneous and Maximum LDH activity controls with respect to cell number for optimum cell seeding number.**

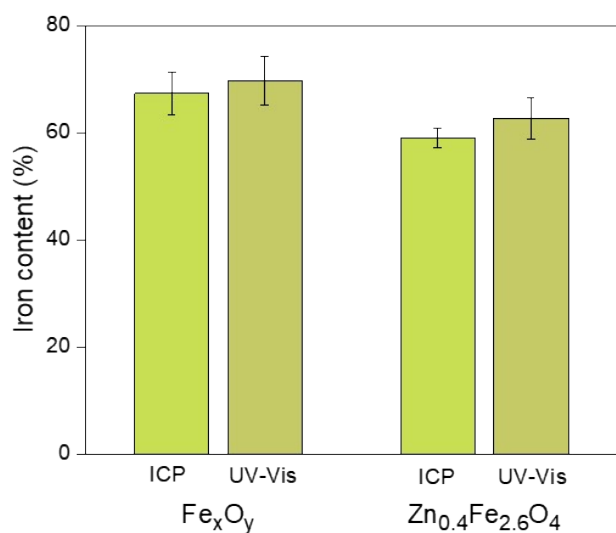

**Figure S4. Comparison of iron content in  $\text{Fe}_3\text{O}_4@\gamma\text{-Fe}_2\text{O}_3$  and  $\text{Zn}_{0.4}\text{Fe}_{2.6}\text{O}_4$  NPs by ICP-OES and UV-Vis measurements ( $n = 5, p > 0.05$ ).**

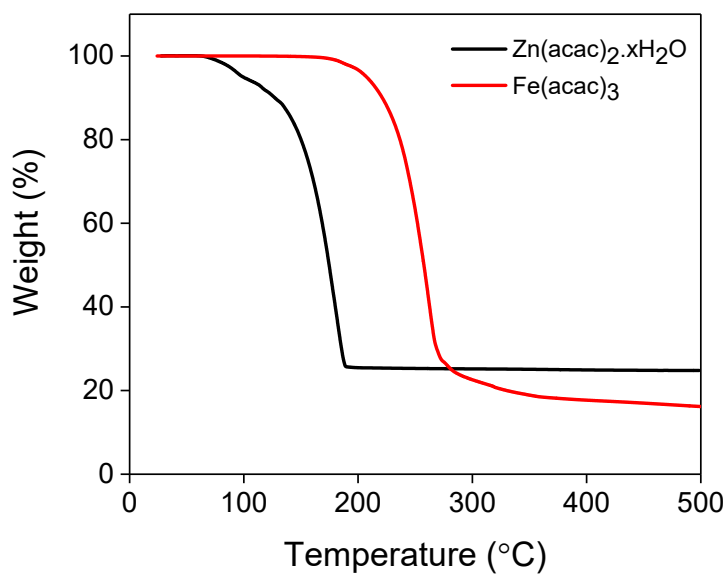

**Figure S5. TGA of Zn(acac)<sub>2</sub>.xH<sub>2</sub>O and Fe(acac)<sub>3</sub> under nitrogen.**

**Table S1. Zinc ferrite NPs with their respective elemental composition, average size and M<sub>S</sub>.**

| Composition                                          | Average size (nm) | M <sub>S</sub> (emu/g) | Reference |
|------------------------------------------------------|-------------------|------------------------|-----------|
| Zn <sub>0.39</sub> Fe <sub>2.61</sub> O <sub>4</sub> | 13.4              | 30                     | 27        |
| Zn <sub>0.16</sub> Fe <sub>2.84</sub> O <sub>4</sub> | 14                | 97                     | 28        |
| Zn <sub>0.4</sub> Fe <sub>2.6</sub> O <sub>4</sub>   | 15                | 99.3 <sup>a</sup>      | 26        |
| Zn <sub>0.34</sub> Fe <sub>2.66</sub> O <sub>4</sub> | 17                | 64.6                   | 29        |
| Zn <sub>0.4</sub> Fe <sub>2.6</sub> O <sub>4</sub>   | 22                | 105 <sup>a</sup>       | 19        |

<sup>a</sup> value converted to emu/g of material from emu/g<sub>Fe+Zn</sub>.

From  $T_B$  values the effective anisotropy ( $K_{\text{eff}}$ ) can be estimated according to eq (1)

$$T_B = \frac{K_{\text{eff}}V}{k_B \ln \left( \frac{\tau_m}{\tau_0} \right)} \quad (1)$$

Where  $T_B$  is the blocking temperature (221 K for  $\text{Fe}_3\text{O}_4@ \gamma\text{-Fe}_2\text{O}_3$  and 175 K for  $\text{Zn}_{0.4}\text{Fe}_{2.6}\text{O}_4$  NPs),  $K_{\text{eff}}$  is the effective anisotropy,  $V$  is the volume of the NPs,  $k_B$  is the Boltzmann constant ( $1.38 \times 10^{-23} \text{ J/K}$ ),  $\tau_m$

is the measurement time and  $\tau_0$  is the attempt time; the value  $\ln \left( \frac{\tau_m}{\tau_0} \right)$  has the value of 25 in typical laboratory measurements:

$$T_B = \frac{K_{eff}V}{k_B \ln\left(\frac{\tau_m}{\tau_0}\right)} \quad \therefore \quad K_{eff} = \frac{T_B k_B \ln\left(\frac{\tau_m}{\tau_0}\right)}{V}$$

$$\therefore K_{eff_{Fe_3O_4@ \gamma - Fe_2O_3}} = \frac{221 \text{ K} \times 1.38 \times 10^{-23} \text{ J/K} \times 25}{0.5 \times 10^{-24} \text{ m}^3} = 1.52 \times 10^{-5} \text{ J/m}^3$$

$$\therefore K_{eff_{Zn_{0.4}Fe_{2.6}O_4}} = \frac{175 \text{ K} \times 1.38 \times 10^{-23} \text{ J/K} \times 25}{0.5 \times 10^{-24} \text{ m}^3} = 1.21 \times 10^{-5} \text{ J/m}^3$$

$$K_{eff} = K + 6 \frac{K_S}{d}$$

$$6 \frac{K_S}{d_{Fe_3O_4@ \gamma - Fe_2O_3}} \equiv 6 \frac{K_S}{d_{Zn_{0.4}Fe_{2.6}O_4}}$$

$$\therefore K \propto K_{eff}$$

$$\text{Since } K_{eff_{Fe_3O_4@ \gamma - Fe_2O_3}} > K_{eff_{Zn_{0.4}Fe_{2.6}O_4}}$$

$$K_{Fe_3O_4@ \gamma - Fe_2O_3} > K_{Zn_{0.4}Fe_{2.6}O_4}$$

**Figure S6: Calculations of the  $K_{eff}$  of  $Fe_3O_4@ \gamma - Fe_2O_3$  and  $Zn_{0.4}Fe_{2.6}O_4$  NPs and estimation of their magnetocrystalline anisotropy (K) value.**

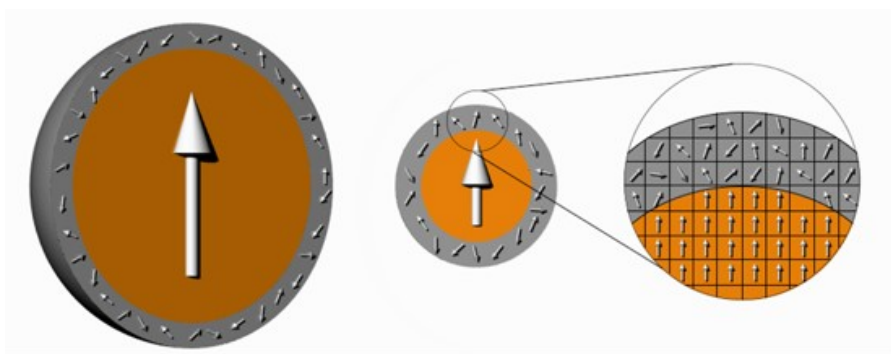

**Figure S7. Illustration of the proportion of spin-canting on large versus small sized NPs.**

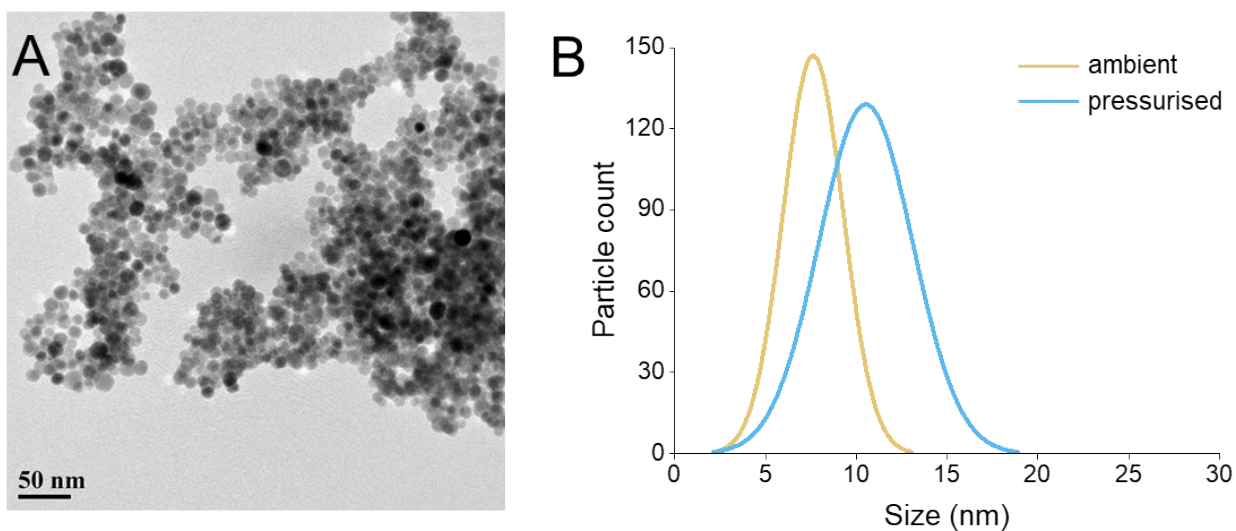

**Figure S8. A) TEM of  $\text{Zn}_{0.4}\text{Fe}_{2.6}\text{O}_4$  NPs prepared under ambient pressure. B) Size distribution histograms of  $\text{Zn}_{0.4}\text{Fe}_{2.6}\text{O}_4$  NPs prepared at high temperature (250 °C) and ambient or autogenous pressure.**

**Table S2. Size, lattice strain and  $M_s$  measurements of  $\text{Zn}_{0.4}\text{Fe}_{2.6}\text{O}_4$  NPs prepared under high temperature with ambient or autogenous pressure ( $n = 3$ ). Values reported as mean  $\pm$  SEM.**

**p-Values were calculated based on a two-tailed t-test: \*\*\* indicates  $p < 0.001$ , \*\* indicates  $p < 0.01$  and \* indicates  $p < 0.05$ .**

|              |            |         |           |
|--------------|------------|---------|-----------|
| Autogenous   | 10.2 ± 2.5 | 108 ± 3 | 1.1 ± 0.2 |
| Ambient      | 7.7 ± 1.7  | 80 ± 7  | 1.5 ± 0.3 |
| Significance | ***        | **      | *         |

**Table S3. Absolute change in temperature and SLP values of  $\text{Fe}_3\text{O}_4@\gamma\text{-Fe}_2\text{O}_3$  and  $\text{Zn}_{0.4}\text{Fe}_{2.6}\text{O}_4$  NPs at 20  $\text{mg}_{\text{Fe+Zn}}/\text{ml}$  subjected to an alternating magnetic field with different product of frequency and amplitude. Values reported as mean ± SEM. p-values were calculated based on a two-tailed t-test between the change in temperature and SLP values of an alternating magnetic field with the same field amplitude but different frequency: \*\* indicates  $p < 0.01$ . n = 3.**

| Field<br>(kA/m) | Frequency<br>(kHz) | $\Delta T \pm \text{SD } (^{\circ}\text{C})$         |                                            | SLP ± S.D (W/g <sub>Fe+Zn</sub> )                    |                                            |
|-----------------|--------------------|------------------------------------------------------|--------------------------------------------|------------------------------------------------------|--------------------------------------------|
|                 |                    | $\text{Fe}_3\text{O}_4@\gamma\text{-Fe}_2\text{O}_3$ | $\text{Zn}_{0.4}\text{Fe}_{2.6}\text{O}_4$ | $\text{Fe}_3\text{O}_4@\gamma\text{-Fe}_2\text{O}_3$ | $\text{Zn}_{0.4}\text{Fe}_{2.6}\text{O}_4$ |
| 10.4            | 342                | 10.3 ± 1.2                                           | 10.7 ± 1.5                                 | 21.6 ± 2.8                                           | 23.4 ± 3.8                                 |
|                 | 471                | 17.9 ± 2.9                                           | 18.1 ± 2.7                                 | 38.5 ± 5.5                                           | 40.5 ± 6.8                                 |
| Significance    |                    | **                                                   | **                                         | **                                                   | **                                         |
| 14.4            | 342                | 17.6 ± 2.4                                           | 17.4 ± 2.2                                 | 37.2 ± 6.6                                           | 37.8 ± 5.9                                 |
|                 | 471                | 24.9 ± 2.2                                           | 25.0 ± 3.4                                 | 63.1 ± 6.6                                           | 63.1 ± 10.1                                |
| Significance    |                    | **                                                   | **                                         | **                                                   | **                                         |

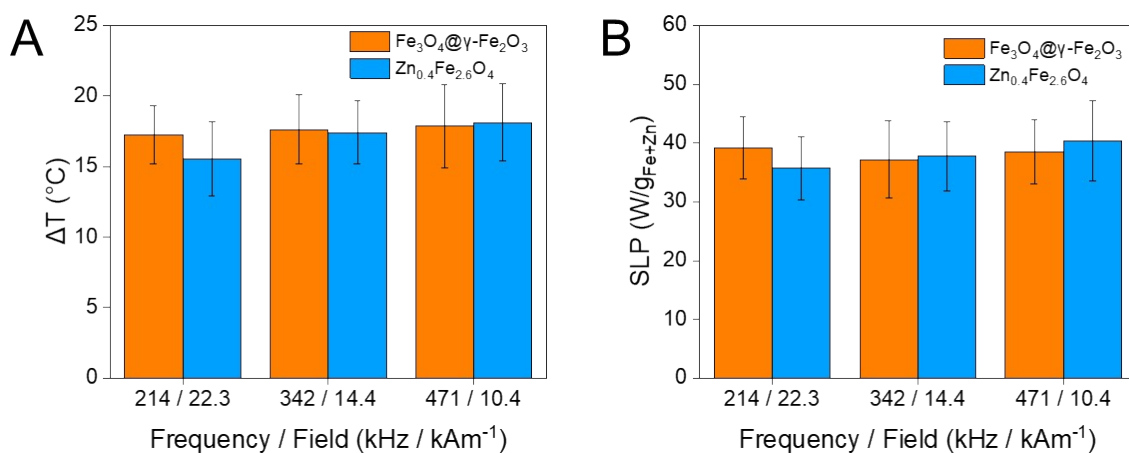

Figure S9. A) and B) is the absolute change in temperature and SLP values respectively, of  $\text{Fe}_3\text{O}_4@\gamma\text{-Fe}_2\text{O}_3$  and  $\text{Zn}_{0.4}\text{Fe}_{2.6}\text{O}_4$  NPs at a concentration of 20  $\text{mg}_{\text{Fe+Zn}}/\text{ml}$  subjected to alternating magnetic fields of different combinations of frequency and field but having similar product of the two.  $n = 3$ .

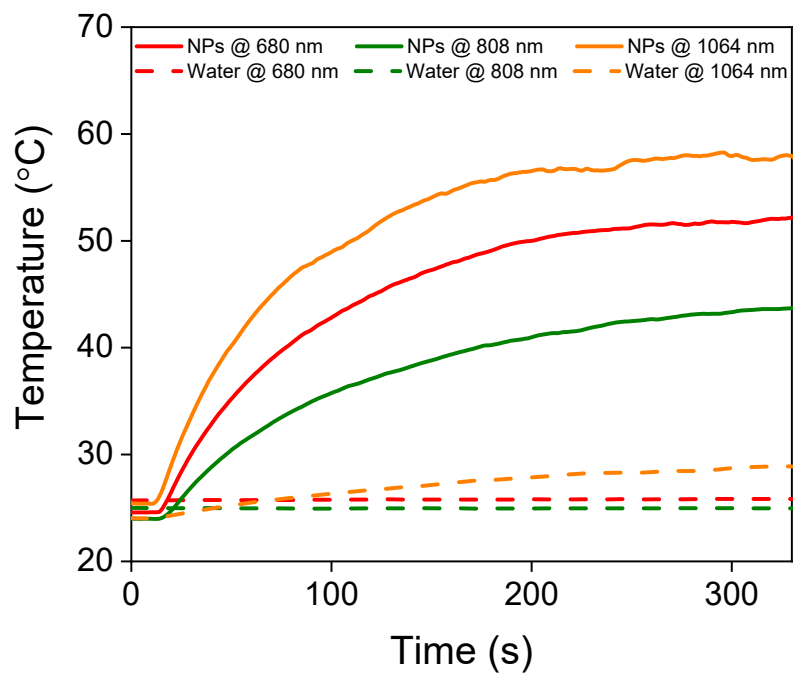

Figure S10. PT measurement of aqueous suspension of  $\text{Zn}_{0.4}\text{Fe}_{2.6}\text{O}_4$  NPs and water only.

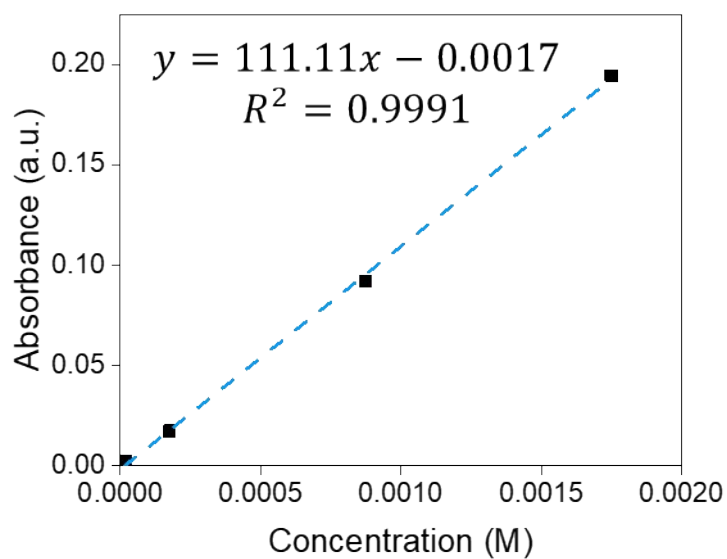

**Figure S11.** Absorbance of 808 nm light of  $\text{Zn}_{0.4}\text{Fe}_{2.6}\text{O}_4$  NPs at different concentrations. The slope yields the molar attenuation coefficient according to Beer-Lambert law.

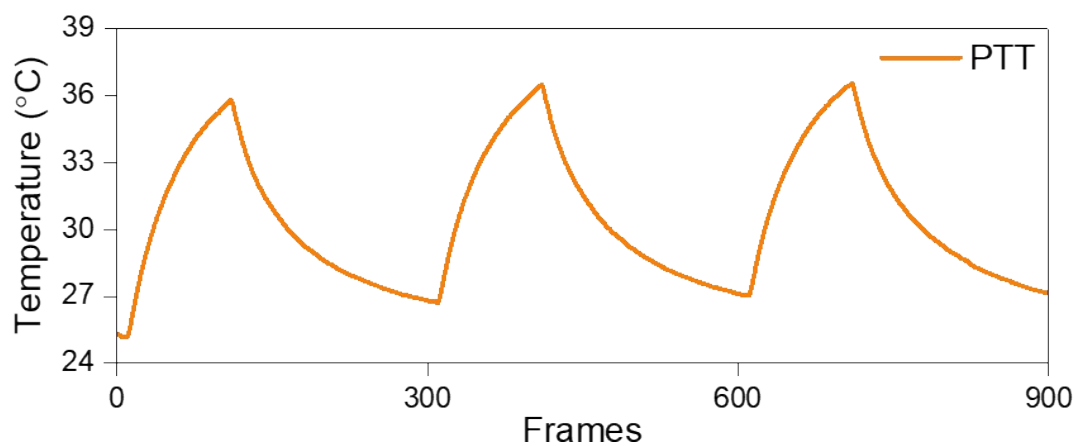

**Figure S12.** Photothermal heating cycles of  $\text{Zn}_{0.4}\text{Fe}_{2.6}\text{O}_4$  NPs at 808 nm.
